# Supplementary material for: Characterising runoff processes for Australia: Insights from a parsimonious rainfall-runoff event identification method
Source: Copernicus journal article supplement (doi:10.5194/egusphere-2025-6241), 2026-02-05
Supplement: Supplementary file [file egusphere-2025-6241-AC2-supplement.pdf]

# Responses to Review Comments to 'Characterising runoff processes for Australia: Insights from a parsimonious rainfall-runoff event identification method' (EGUSPHERE-2025-6241)

Our responses are in blue and proposed revision are underlined.

## Reviewer 1

The manuscript introduces the Robust Variance-based Event Identification Method (RVEIM), a new and efficient approach for pairing rainfall and runoff events in hydrological studies. Traditional statistical methods often suffer from subjective parameter selection, leading to inconsistent results and physically impossible outcomes, such as runoff volumes exceeding rainfall. By utilizing streamflow variance and a time-variant search window, RVEIM minimizes these uncertainties and better reflects natural catchment responses. When tested across diverse Australian catchments, the method proved more stable than traditional local maxima benchmarks, showing significantly less variation in event characteristics. Overall, the method shows promise for applications in flood analysis and hydroclimatic studies. The study addresses an important methodological gap, and the proposed framework is potentially valuable. The manuscript is generally well written. However, several issues should be addressed to further strengthen the work prior to publication.

We thank the reviewer for the positive assessment of our work and for the constructive feedback provided.

## Major Comments:

- The paper presents RVEIM as a significant improvement over existing methods, yet it primarily benchmarks it against a single "local maxima" method. While the authors justify this choice by citing the local maxima method's relatively lower uncertainty compared to others, the paper would be significantly strengthened by comparing RVEIM directly to the variance-based method by Fischer et al. (2021). Since RVEIM is an extension of that specific framework, a direct comparison is necessary to isolate and quantify the specific value-add of the authors' new contributions, such as the simultaneous pairing and the time-variant search window. Furthermore, Table 1 identifies several other sophisticated methods (e.g., DMCA or modified baseflow filters) that are not addressed in the evaluation; including at least one other modern automated method would provide a more rigorous validation of RVEIM's "transferability" and "robustness" across Australia's diverse hydro-climates.

We agree that a broader benchmarking would strengthen the evaluation of RVEIM. In the original manuscript, we selected the *local maxima* method as a widely used and representative benchmark. However, we acknowledge that additional comparisons can provide a more comprehensive assessment of robustness and transferability.

Following the reviewer's suggestion, we will consider including additional benchmarking to strengthen the evaluation. Fischer et al. (2021) and Giani et al. (2022) developed two relevant but distinct frameworks. The DMCA method developed by Giani et al. (2022) has a similar level of complexity to RVEIM as it has only two parameters ( $R_{min}$ , and  $max\_winsow$ ) and simultaneously detects and pairs rainfall-runoff events. Hence, we will perform an additional sensitivity analysis using the DMCA method by Giani et al. (2022) to assess how its parameterization influences the uncertainty of identified rainfall-runoff event characteristics.

- In Equation 2, the search window length is defined using  $best\_lag$ , which is calculated as the average time between the start of a rainfall event (as shown in a hyetograph) and the start of a runoff event (as shown in a hydrograph). However, it is not clearly explained how this

parameter is calculated in practice. In particular, in the procedure used to identify the start times of rainfall and runoff events, as illustrated in Figure 4, *best\_lag* is not shown as how it is calculated.

Thank you for this helpful comment. We agree that the description of *best\_lag* was not sufficiently clear and may have led to confusion. In our method, *best\_lag* is determined, prior to event identification, based on the time lag that maximizes the cross-correlation between rainfall and lagged streamflow time series. Therefore, it is not explicitly shown in Fig. 4, which focuses on the event identification procedure after rainfall events are defined.

We will revise the manuscript to clearly distinguish between the definition and interpretation of *best\_lag*. Specifically, we propose revising lines 164–169 as follows:

*“3. Cross-correlation. A runoff event is paired with the corresponding rainfall event based on a time-varying search window controlled by two parameters. The first parameter, which is constant across rainfall events, is best\_lag. This parameter is defined as the lag between rainfall and streamflow that maximizes the cross-correlation between these variables (and is calculated prior to rainfall event detection). Physically, best\_lag represents the average response time between rainfall and runoff. The second parameter controlling the length of the search window is l\_rainfall, which corresponds to the duration of the rainfall event. Therefore, this parameter varies from one rainfall event to another.”*

Minor Comments:

- The subplot labeling is inconsistent across figures (e.g., use of “a” vs. “(a)” in Figures 6 and 8). Please standardize. Also, their font size is not consistent, e.g. Figure 9.

Thank you for this comment. We will standardize subplot labeling across all figures and ensure consistent font sizes throughout all figures to improve clarity and visual consistency.

Reviewer 2

This manuscript provides a very useful contribution by introducing a novel, physically based and parsimonious event identification method that exhibits excellent robustness. This offers a standardised and transferable approach for event identification that forms the starting point of much hydrological analysis. However, some aspects of the methodology would benefit from further elucidation.

We sincerely thank the reviewer for the positive assessment of our work and for the constructive and insightful comments provided. We particularly appreciate the recognition of the methodological contribution and robustness of the proposed approach. Below, we provide a detailed point-by-point response to each comment.

Major Comments:

- The algorithm flow chart in Figure 2 is a very useful inclusion that I commend, however, please consider the following:
  1. Consider spacing out the boxes within the “Streamflow statistics” window to allow better interpretation of the flow arrows.
  2. The left arrow from the first diamond “ $n_{\text{exceed}} \geq \text{len}_{\text{rain}} \ \& \ \text{length}(\text{QD}[\text{idx}_{\text{candidate}}]) > 0$ ” is misleading as it says, “We have no streamflow event” yet it flows to “Calculate streamflow event characteristics”.
  3. For both diamonds it is unclear under what condition you should follow which arrow.

Thank you for these helpful suggestions regarding the flowchart in Figure 2.

1. We agree that the spacing within the “Streamflow statistics” section can be improved. In the revised figure, we will increase the spacing between elements and reorganize the layout so that the pathways to the green boxes are vertically aligned, improving readability and flow interpretation.
2. We acknowledge that the left arrow from the first decision diamond may be misleading. Our intention was to represent cases where rainfall does not generate a detectable runoff event. In such cases, we still consider this as part of the rainfall-runoff process, with resulting event characteristics (runoff volume, duration, and runoff coefficient) equal to zero. To avoid confusion, we will revise the flowchart and clarify the logic in both the figure and its caption.
3. We agree that the decision logic within the diamonds was not sufficiently clear. In the revised flowchart, we will explicitly label each branch using “True” and “False” conditions. This will allow readers to clearly understand under which conditions each pathway is followed and improves the overall interpretability of the flowchart.

We provide the proposed amended flowchart in Fig. R1.

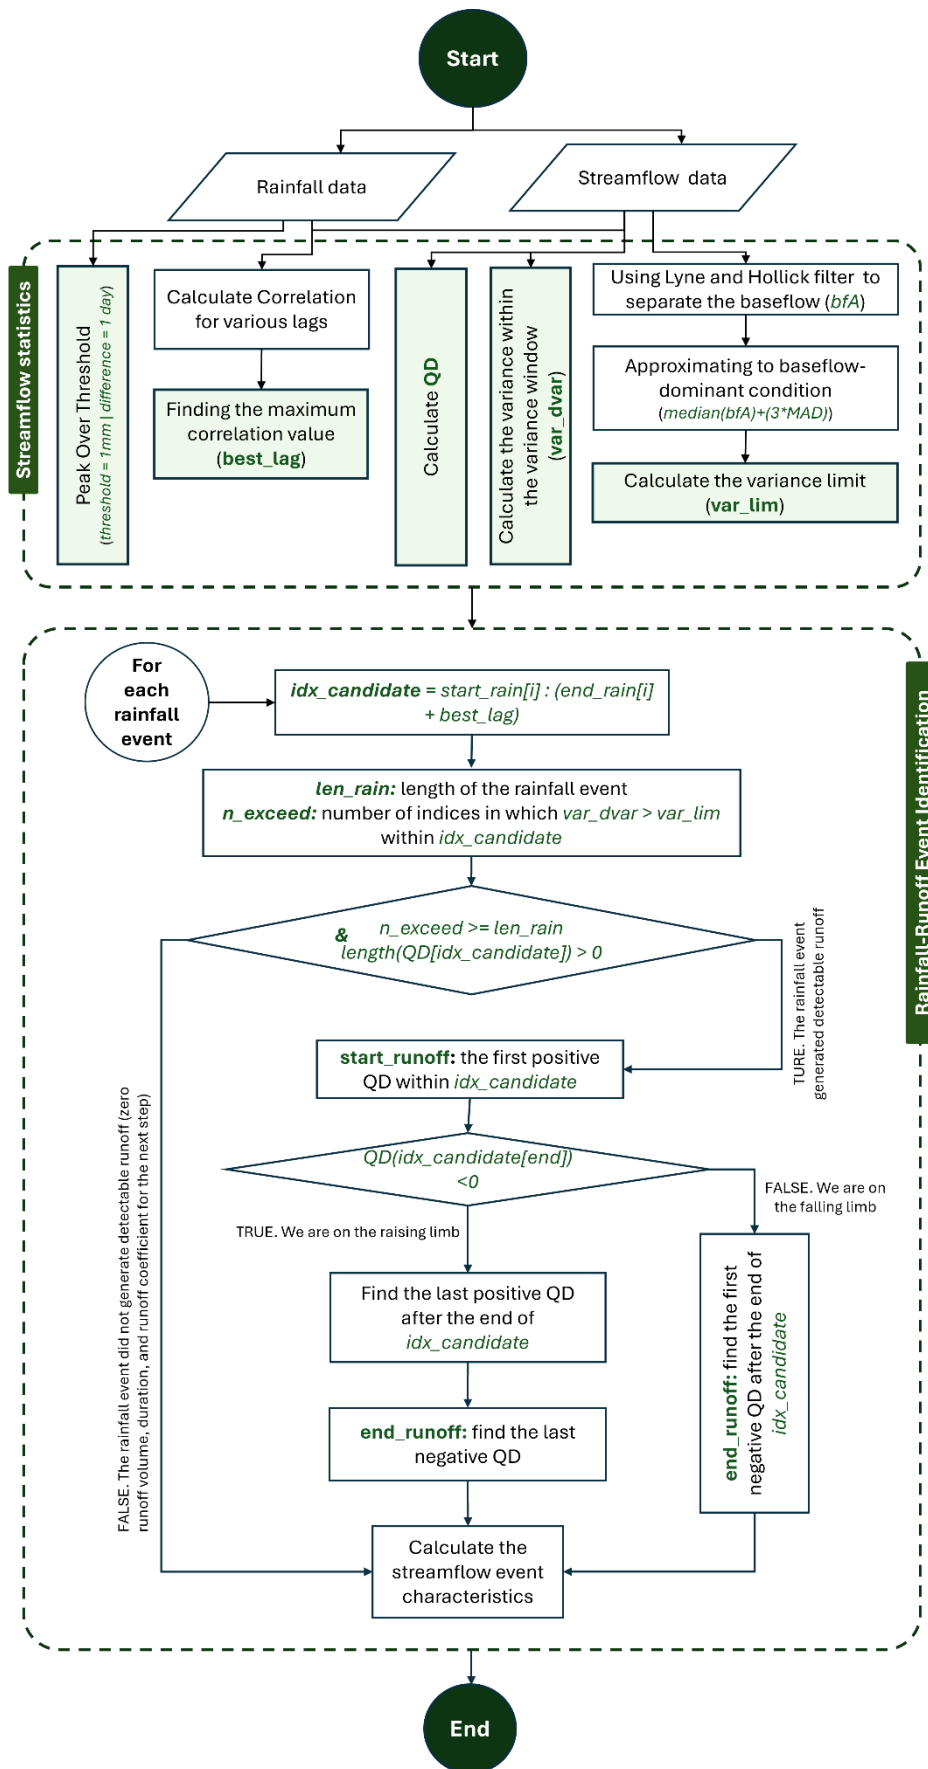

Fig. R1. The flowchart of RVEIM.

- Please clarify the basis for the \*3 scaling factor in equation 4.

Thank you for this comment. This choice of \*3 scaling factor is consistent with robust approaches based on median absolute deviation (MAD), where thresholds in the range of 2–3 are commonly used (Voloh et al., 2020). In this study, we adopt a factor of 3 as a conservative threshold to ensure that only substantial changes in streamflow variability are identified, while avoiding sensitivity to minor fluctuations.

The scaling factor of 3 is also consistent with commonly adopted outlier detection methods which work based on standard deviation (SD). In such methods, values beyond  $\pm 3$  SD are typically considered rare and indicative of significant deviations from typical behaviour (Fahrnberger, 2019; Santacroce, 2020).

- Can you please add further explanation as to why  $n\_exceed \geq len\_rain$  is a necessary condition. Are there any situations, such as on a small catchment, where this may not be the case? Does this add any uncertainty? I am not suggesting any further analysis is required, rather just some further discussion. For example, my understanding is that “best\_lag” will vary based on the catchment and this should ensure that on average  $n\_exceed \geq len\_rain$ . Some words to this effect would be beneficial, I think.

Thank you for this insightful comment. We agree that further discussion/clarification of this condition is beneficial.

The condition  $n\_exceed \geq len\_rain$  is introduced to ensure that the identified streamflow response is sufficiently sustained relative to the duration of the corresponding rainfall event. Conceptually, this reflects the expectation that a rainfall event leading to runoff should generate a streamflow signal that persists for at least a comparable duration, due to processes such as storage, routing, and recession, rather than a short-lived or spurious fluctuation (e.g., due to instrumental error etc.). This constraint is not determined by “best\_lag”, estimates the typical timing of the runoff response, estimated separately from the rainfall-runoff relationship for each catchment.

In addition, empirical evidence supports the expectation that runoff duration is typically equal to or longer than the duration of the corresponding rainfall event, even in relatively small catchments. For example, in a small headwater catchment in Hong Kong, Zhang et al. (2023) showed that rainfall duration ranged from 24–662 min (mean 108 min), while runoff recession alone ranged from 73–591 min. This reflects the persistence of streamflow due to routing and recession processes following rainfall. Therefore, the adopted condition represents a reasonable and physically consistent expectation for rainfall-runoff events.

We propose adding a sentence in lines 202-204 to make this clear:

*“In the search window, if the length of streamflow records which exceed  $var\_lim$  ( $n\_exceed$ ) is greater or equal to the length of rainfall, the first positive QD represents the start of the runoff event (see the start of bold line of streamflow for both events in Fig. 4). Otherwise, there is no runoff event in the search window. This condition reflects the expectation that a rainfall event leading to runoff should produce a sufficiently sustained streamflow response, rather than a short-lived or spurious fluctuation which might be due to instrumental error.”*

- Line 254-255: I’m concerned about the lack of sensitivity testing for alpha in the local maxima event identification. Whilst I appreciate that it would unlikely change the results significantly or the conclusion of the study, I think for completeness alpha should either be sampled for both or neither algorithm, as it will have an impact on event identification.

Thank you for this important comment. We agree that, for completeness, including *alpha* in the sensitivity analysis of the *local maxima* method is a reasonable consideration.

In the original design of this study, we focused on comparing the overall uncertainty of event identification methods, noting that methods with higher number of parameters are generally expected to exhibit higher sensitivity to the parameter choices. Therefore, we aimed to evaluate each method based on its commonly used parameter configuration. As such,  $\alpha$  was not explicitly varied for the *local maxima* method in the original analysis.

However, following the suggestion, we will perform an additional sensitivity check to explore how varying  $\alpha$  affects the results for the *local maxima*.

- Could you please clarify the ranges of parameters for Local maxima in Table 3, particularly for  $\Delta y$ ? Often the  $\Delta y$  parameter is specified as a proportion of the peak to account for different catchment scales, however, here it is flow value. Given the range of catchment sizes investigated, i.e. 102-105, is it possible that the uncertainty of the local maxima algorithm is inflated by sampling across an implausible range for some catchments? I also note that in the author's cited paper from 2025, in Table 1 the parameter range for  $\Delta y$  in the local maxima algorithm is the proportion 0.9-0.7 whilst the  $\Delta y$  for a different algorithm, local minima, is 0-30 which is what is used in this manuscript. Can you please clarify this?

Thank you for this careful and important observation. We acknowledge that there was an error in reporting the range of the  $\Delta y$  parameter in Table 3. The correct range of  $\Delta y$  is between  $-0.9$  and  $-0.7$  (Mohammadpour Khoie et al., 2025), which represent a proportional decrease of 0.9 to 0.7 from the local maxima. Importantly, this error was limited to the reporting in Table 3 and did not affect the implementation of the *local maxima* algorithm in our analysis. The parameter sampling was conducted using the correct proportional definition, and therefore the reported uncertainty is not inflated by an implausible parameter range.

We will fix this reporting in the revision.

- Looking at the results in Figure 5 is it possible that RVEIM is truncating the start of events by starting at  $i$ , where  $QD_i$  is first positive, which is resulting in the shorter event lengths and lower volumes in Figure 6 b) & c), and typically lower RC values in Figure 7)? Could you consider starting at  $i-1$  instead?

Thank you for this insightful comment. We acknowledge that, as illustrated in Fig. 5, some runoff events may appear visually truncated at their start. This is primarily a consequence of discretizing continuous streamflow signals into discrete time steps, rather than a limitation in the event identification concept itself. Shifting the starting point one time step backward only marginally affects event characteristics, typically resulting in a one-step increase in duration and a slight increase in runoff volume, without altering the overall patterns or key conclusions of the study. To assess the impact of this choice, we repeated the analysis for representative catchments by shifting the starting index of runoff events one time step backward. The results (Fig. R2) show only minor changes in runoff event duration and a small increase in runoff volume compared to the original Fig. 6 in the manuscript. These changes do not alter the overall patterns or key conclusions of the study. Given that these changes are minimal and do not affect the key conclusions, we prefer to retain the original results in the main manuscript. We will add these results (shown in Fig. R2) to the Supplementary section in the revision process.

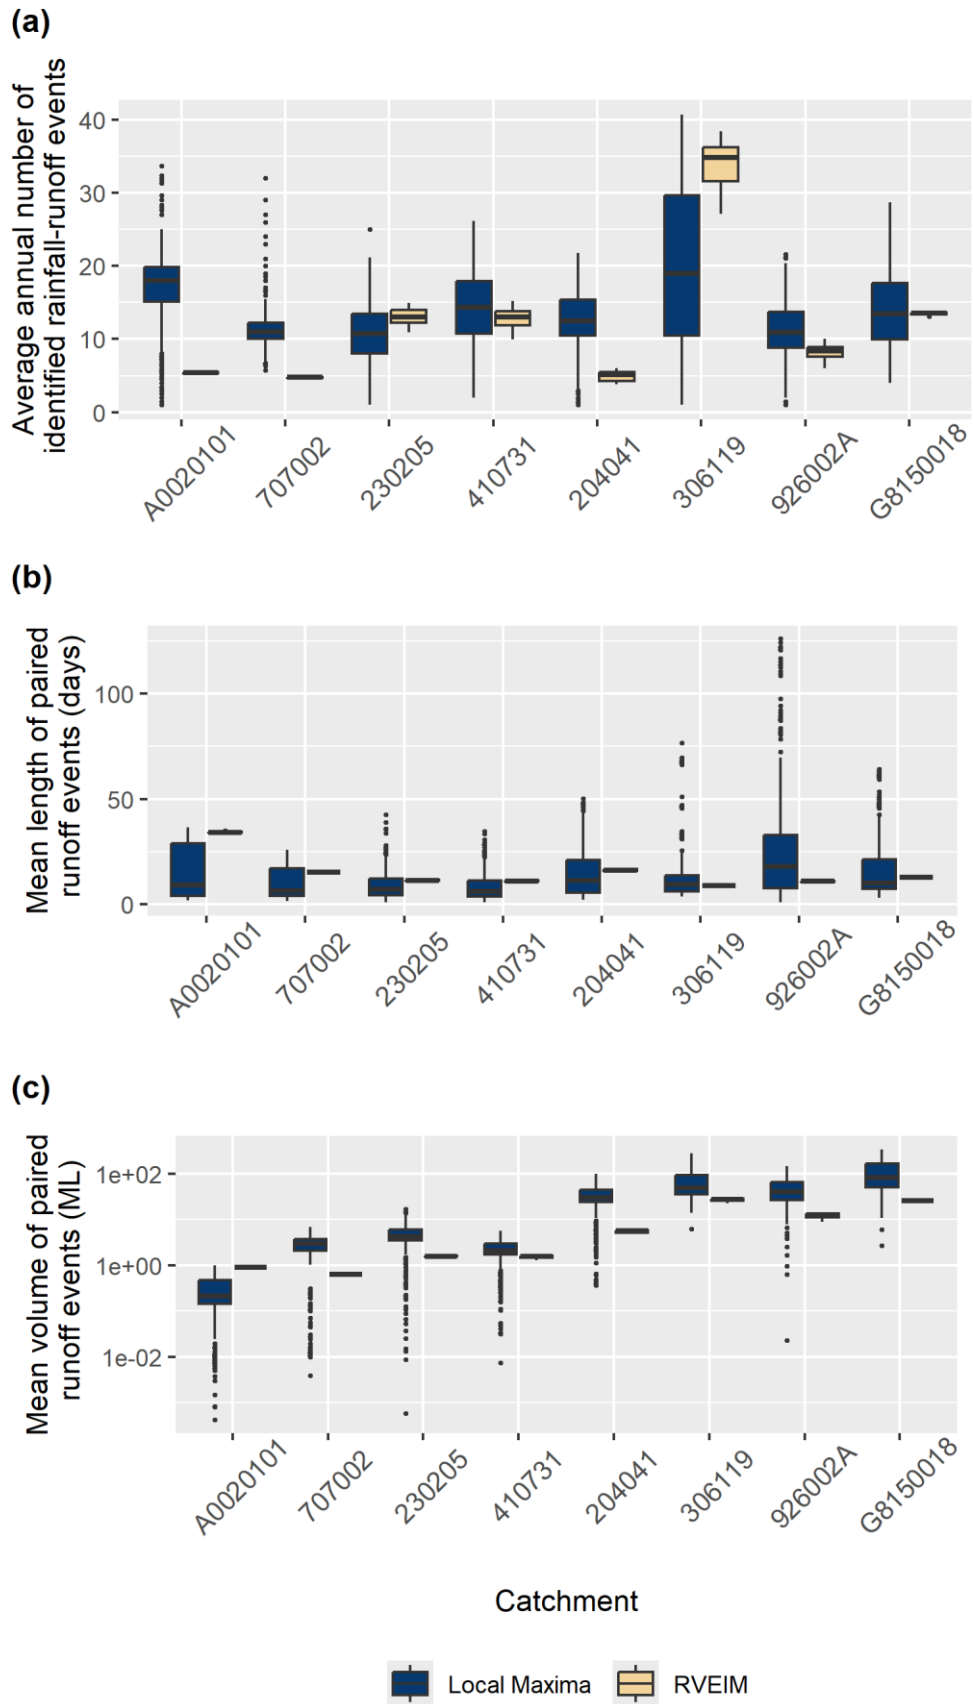

**Fig. R2.** Boxplots of annual characteristics of paired runoff events identified by the proposed method and the local maxima method. a) average annual number of rainfall-runoff events b)

mean length of paired runoff events c) mean volume of paired runoff events (log-scale). The starting point of all runoff events has shifted one step backward.

- I think the results shown in figure 5.2 should be moved out of the discussion and up into the results.

We agree that the results shown in Fig. 11 are relevant to the interpretation of the study. However, as this figure provides supplementary analysis supporting the main findings rather than a core result, it will be moved to improve the flow and readability of the main Discussion section.

- It would be worth commenting in the discussion whether RVEIM would generalise to use on subdaily data.

Thank you for this valuable suggestion. *RVEIM* fundamentally detects a runoff event based on streamflow sudden changes around each independent rainfall event considering some expectations like  $n_{exceed} \geq I_{rainfall}$ . Therefore, in principle, the method can be extended to sub-daily data, provided that rainfall events can be consistently defined at finer temporal resolutions.

However, we acknowledge that sub-daily applications may introduce additional complexities, such as increased signal variability and noises and the need for more precise event separation. These factors may require minor adjustments to parameter definitions or thresholds. We will add a discussion in the revised manuscript to clarify the potential applicability and limitations of *RVEIM* for sub-daily data.

Minor Comments:

- Please review the manuscript and ensure correct spelling and grammar is used throughout. We will carefully review the entire manuscript and correct grammatical errors, typos, and wording where necessary to improve clarity and readability.
- Please rephrase lines 98-100 "We demonstrated that the proposed rainfall-runoff event identification method leads to noticeably lower percentage of RCs better reflecting physical processes" as it is hard to interpret.

We suggest the revision of this sentence as follows:

"We show that the proposed rainfall-runoff event identification method yields a lower proportion of physically implausible RCs, indicating improved consistency and a better representation of underlying hydrological processes."

- Please check that the correct conversion of units has been undertaken for Mean annual streamflow in Table 2.

Thank you for your careful attention. In this study, streamflow is originally measured in ML/day. However, in Table 2, for the purpose of comparison across catchments, we converted mean annual streamflow to an equivalent depth (mm) by normalizing by catchment area. This allows direct comparison with mean annual rainfall and provides a more intuitive interpretation of the proportion of rainfall contributing to runoff across different catchments.

We suggest revising the table caption as follows to add clarity:

"Table 2. Hydroclimate and catchment-specific characteristics of selected catchments. Mean annual streamflow is expressed as an equivalent depth (mm/day) obtained by dividing gauged flow in ML/day by catchment area."

## References

- Fahrnberger, G. (2019). Outlier removal for the reliable condition monitoring of telecommunication services. 2019 20th International Conference on Parallel and Distributed Computing, Applications and Technologies (PDCAT),
- Fischer, S., Schumann, A., & Bühler, P. (2021). A statistics-based automated flood event separation. *Journal of Hydrology X*, *10*, 100070.
- Giani, G., Tarasova, L., Woods, R. A., & Rico-Ramirez, M. A. (2022). An objective time-series-analysis method for rainfall-runoff event identification. *Water Resources Research*, *58*(2), e2021WR031283.
- Mohammadpour Khoie, M. M., Guo, D., & Wasko, C. (2025). Improving the consistency of hydrologic event identification. *Environmental Modelling & Software*, *191*, 106521. <https://doi.org/https://doi.org/10.1016/j.envsoft.2025.106521>
- Santacroce, M. (2020). SCREEN: Stata module to quickly identify possible outliers based on the interquartile range, percentile or standard deviation.
- Voloh, B., Watson, M. R., König, S., & Womelsdorf, T. (2020). MAD saccade: Statistically robust saccade threshold estimation via the median absolute deviation. *Journal of eye movement research*, *12*(8), 65.
- Zhang, L., Xu, Q., Wang, K., Chen, G., Luo, Z., Li, X., & Guo, B. (2023). Event-scaled hydrological response of a headwater catchment in Hong Kong [Original Research]. *Frontiers in Environmental Science*, Volume 11 - 2023. <https://doi.org/10.3389/fenvs.2023.1218239>
